# Supplementary material
Source: Springer Nature journal article supplement (https://www.springermedizin.de/resource/supplementary/12960_2012_326_MOESM6_ESM.pdf/9569956)
Supplement: MOESM6 [file 9569956]

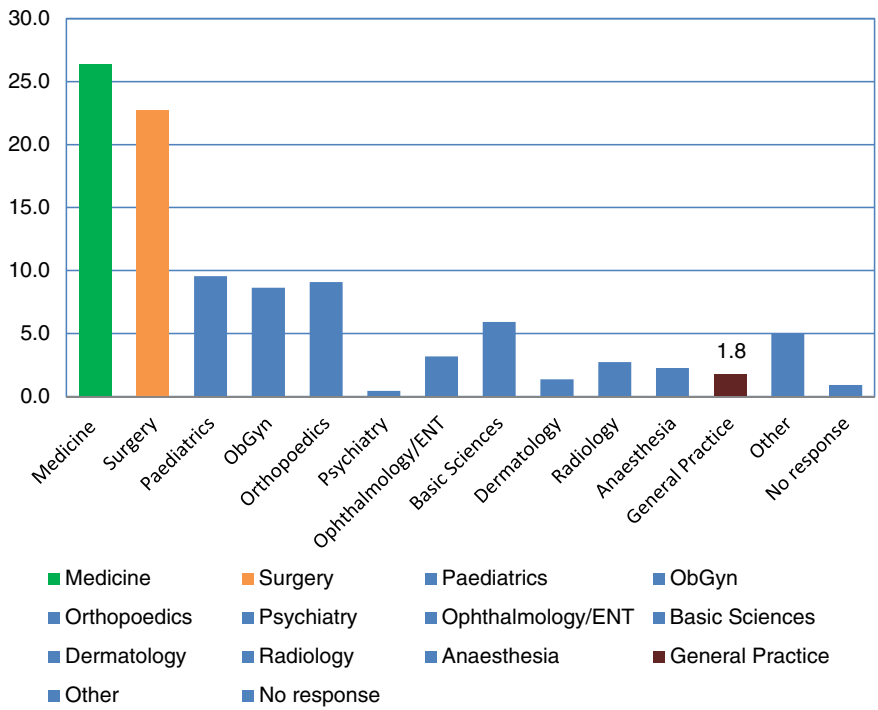

### Comparison of most favoured choices

| Category              | Medicine       | Surgery        |
|-----------------------|----------------|----------------|
| Males                 | 33/127 (26.0%) | 38/127 (29.9%) |
| Females               | 24/92 (26.1%)  | 12/92 (13.0%)  |
| In Kathmandu College  | 32/108 (29.6%) | 25/108 (23.1%) |
| Out Kathmandu College | 26/113 (23.0%) | 25/113 (22.1%) |
| SLC in Kathmandu      | 24/95 (25.3%)  | 19/95 (20.0%)  |
| SLC Out of Kathmandu  | 31/118 (26.3%) | 31/118 (26.3%) |
| Year 1                | 21/48 (43.8%)  | 7/48 (14.6%)   |
| Final and Doctors     | 37/173 (21.4%) | 43/173 (58.9%) |
